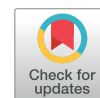

Wai San Cheang,<sup>1,2</sup> Wing Tak Wong,<sup>3</sup> Lei Zhao,<sup>1</sup> Jian Xu,<sup>1</sup> Li Wang,<sup>1</sup> Chi Wai Lau,<sup>1</sup> Zhen Yu Chen,<sup>3</sup> Ronald Ching Wan Ma,<sup>4</sup> Aimin Xu,<sup>5</sup> Nanping Wang,<sup>6</sup> Xiao Yu Tian,<sup>1</sup> and Yu Huang<sup>1</sup>

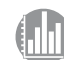

# PPAR $\delta$ Is Required for Exercise to Attenuate Endoplasmic Reticulum Stress and Endothelial Dysfunction in Diabetic Mice

Diabetes 2017;66:519–528 | DOI: 10.2337/db15-1657

Physical activity has profound benefits on health, especially on cardiometabolic wellness. Experiments in rodents with trained exercise have shown that exercise improves vascular function and reduces vascular inflammation by modulating the balance between nitric oxide (NO) and oxidative stress. However, the upstream regulator of exercise-induced vascular benefits is unclear. We aimed to investigate the involvement of peroxisome proliferator-activated receptor  $\delta$  (PPAR $\delta$ ) in exercise-induced vascular functional improvement. We show that PPAR $\delta$  is a crucial mediator for exercise to exert a beneficial effect on the vascular endothelium in diabetic mice. In *db/db* mice and high-fat diet-induced obese mice, 4 weeks of treadmill exercise restored endothelium-dependent vasodilation of aortas and flow-mediated vasodilation in mesenteric resistance arteries, whereas genetic ablation of Ppar $\delta$  abolished such improvements. Exercise induces AMPK activation and subsequent PPAR $\delta$  activation, which help to reduce endoplasmic reticulum (ER) and oxidative stress, thus increasing NO bioavailability in endothelial cells and vascular tissues. Chemical chaperones 4-phenylbutyric acid and tauroursodeoxycholic acid decrease ER stress and protect against endothelial dysfunction in diabetic mice. The results demonstrate that PPAR $\delta$ -mediated inhibition of ER stress contributes to the vascular benefits of exercise and provides potentially effective targets for treating diabetic vasculopathy.

Cardiovascular disease (CVD), which is among the top causes of mortality and disability worldwide, is attributed primarily to the high prevalence of obesity and diabetes (1). Existing epidemiological studies have long highlighted the protective benefits of exercise against CVD in healthy individuals and in patients with hypertension, type 2 diabetes, or chronic heart disease (2,3). Physical exercise, with its vasoprotective outcomes, has been suggested to rival or even outperform CVD medication (4,5).

The endoplasmic reticulum (ER) is a crucial organelle responsible for protein folding, maturation, quality control, and trafficking (6). Only properly folded proteins can be destined to cellular organelles or cell surface; nevertheless, misfolded or unfolded proteins are retained in the ER to eventually be degraded (7). Disruption of the aforementioned processes causes retention of newly synthesized unfolded proteins in the ER, and this condition is defined as ER stress. In response to ER stress, the three branches of the unfolded protein response are activated through the initiation of three ER membrane-associated proteins—PKR-like endoplasmic reticulum kinase (PERK), inositol-requiring enzyme 1 (IRE1), and activating transcription factor 6 (ATF6)—and engaged in complex downstream signaling pathways (6,8). The transcriptional factors downstream of these proteins collectively induce unfolded protein response target genes involved in protein synthesis,

<sup>1</sup>Institute of Vascular Medicine, Shenzhen Research Institute, Li Ka Shing Institute of Health Sciences, School of Biomedical Sciences, Chinese University of Hong Kong, Hong Kong

<sup>2</sup>Institute of Chinese Medical Sciences, State Key Laboratory of Quality Research in Chinese Medicine, University of Macau, Macau

<sup>3</sup>School of Life Sciences, Chinese University of Hong Kong, Hong Kong

<sup>4</sup>Department of Medicine and Therapeutics, Hong Kong Institute of Diabetes and Obesity, Prince of Wales Hospital, Chinese University of Hong Kong, Hong Kong

<sup>5</sup>Departments of Medicine and Pharmacology and Pharmacy, State Key Laboratory of Pharmaceutical Biotechnology, University of Hong Kong, Hong Kong

<sup>6</sup>Advanced Institute for Medical Sciences, Dalian Medical University, Dalian, China

Corresponding authors: Yu Huang, [yu-huang@cuhk.edu.hk](mailto:yu-huang@cuhk.edu.hk), and Xiao Yu Tian, [xvtian@cuhk.edu.hk](mailto:xvtian@cuhk.edu.hk).

Received 9 December 2015 and accepted 11 November 2016.

This article contains Supplementary Data online at <http://diabetes.diabetesjournals.org/lookup/suppl/doi:10.2337/db15-1657/-/DC1>.

© 2017 by the American Diabetes Association. Readers may use this article as long as the work is properly cited, the use is educational and not for profit, and the work is not altered. More information is available at <http://www.diabetesjournals.org/content/license>.

oxidative stress, inflammation, and apoptosis. ER stress markers are activated at atherosusceptible arterial sites (9) in *ob/ob* mice and in mice fed a high-fat diet (10). Of note, many risk factors that induce endothelial dysfunction and vascular inflammation, such as high glucose (11), free fatty acid (12), and oxidized and glycated LDL (13), can also induce ER stress, suggesting that ER stress may be a potential mechanism underlying diabetic vasculopathy.

Although in humans it is well known that exercise training benefits endothelial function, the underlying cellular mechanisms are not fully elucidated. In mice, the increase of nitric oxide (NO) bioavailability and reduction of reactive oxygen species (ROS) level by moderate exercise inhibit the development of atherosclerosis in mice (14). Exercise reduces oxidative stress by inducing antioxidative enzymes, including uncoupling protein 1, mitofusin-2, and Nrf2 (15,16). Of note, exercise augments shear stress in the blood vessels, which is the primary stimulant for the release of NO in endothelial cells (17). The vascular benefits of exercise are mainly focused on shear stress-induced vasodilatation, which is largely attributed to the increment of NO production and release as well as diminishment of ROS formation, but detailed signaling pathways remain to be further explored.

Studies on the effect of exercise on metabolic reprogramming in skeletal muscle have revealed several transcription factors and serine-threonine kinases (18,19), including AMPK, which is the major enzyme responsible for glucose homeostasis and energy balance and important for endothelial cell function (20,21). AMPK has been reported to interact with peroxisome proliferator-activated receptors (PPARs) to improve lipid metabolism during exercise (22). AMPK activation improves vascular and metabolic functions because it is a natural suppressor of ER stress (13), and it forms a transcriptional complex with PPAR $\delta$  to induce the transcription of several PPAR target genes in skeletal muscle (23). We have shown that PPAR $\delta$  is an essential mediator for metformin (AMPK activator) to reduce ER stress and protect endothelial function in the aortas of obese mice (24), which led us to postulate that the vascular benefit of exercise also depends on PPAR $\delta$ . The purpose of the current study was to evaluate the impact of exercise training on vascular ER stress and to investigate whether exercise training ameliorates endothelial dysfunction in diabetic mice through stimulating the AMPK-PPAR $\delta$  signaling cascade with the use of *db/db* mice and *Ppard*-deficient mice.

## RESEARCH DESIGN AND METHODS

### Animal Experiments

The use of animals for these experiments was approved by the Animal Research Ethical Committee of the Chinese University of Hong Kong (CUHK) and was consistent with the Guide for the Care and Use of Laboratory Animals. Animals were male leptin receptor-deficient *db/db* (homozygous) and age-matched *db/m*<sup>+</sup> heterozygous mice generated from the C57BL/KsJ, male C57BL/6J mice, male

*Ppard* knockout (KO) mice, and age-matched *Ppard* wild-type (WT) littermates generated from the C57BL/6N  $\times$  129/Sv background (25). All animals were supplied by the CUHK Laboratory Animal Service Center and were housed in animal holding rooms with controlled temperature (22–23°C) with an alternating 12-h light/dark cycle. Diet-induced obese (DIO) mice were generated by feeding *Ppard* KO and age-matched *Ppard* WT littermates at the age of 6 weeks a high-fat diet for 10–12 weeks (Rodent Diet with 45 kcal% fat, D12451; Research Diets, New Brunswick, NJ). Male *db/m*<sup>+</sup> and *db/db* mice at 12–14 weeks were randomly divided into several groups and administered orally with 4-phenylbutyric acid (PBA) 100 mg/kg/day (Sigma-Aldrich, St. Louis, MO), tauroursodeoxycholic acid (TUDCA) 100 mg/kg/day (Sigma-Aldrich), or vehicle for 4 weeks.

### Exercise Protocol

Male *db/m*<sup>+</sup>, *db/db*, *Ppard* WT, and *Ppard* KO mice aged 11–13 weeks were randomly divided into several groups and trained to run on a motorized treadmill exercise system. To allow for animal acclimatization, exercise duration and intensity were gradually increased over the first week of exercise exposure. The exercise speed was initially set at 5 m/min for 30 min and then incrementally increased to the target speed at 8 m/min for 30 min (240 m total). This exercise intensity was well below the tolerance level of the mouse (26). Mice were exercised daily, 6 days/week, for 4 weeks after 1 week of training (5 weeks total). Sedentary groups were placed on a nonmoving treadmill for the same duration as the exercise groups.

### Isometric Force Measurement in Wire Myograph

After animals were sacrificed, thoracic aortas and mesentery arteries were rapidly removed and placed in oxygenated ice-cold Krebs-Henseleit solution. Segments of mouse aortas or mesenteric arteries were mounted to a Multi Wire Myograph System (Danish Myo Technology, Aarhus, Denmark), and changes in isometric tension were measured as previously described (27). Endothelium-dependent relaxation (EDR) was determined by cumulative addition of acetylcholine (ACh) (3 nmol/L to 10  $\mu$ mol/L) in phenylephrine (Phe) (3  $\mu$ mol/L) precontracted segments. In some mesenteric rings, insulin (1 nmol/L to 1  $\mu$ mol/L)-induced relaxations were also assessed. Some segments were incubated with thapsigargin (0.1  $\mu$ mol/L), an ER stress inducer (Tocris Bioscience), or L- $\alpha$ -lysophosphatidylcholine (LPC) (30  $\mu$ mol/L), a major component of oxidized LDL, for 30 min before EDR measurement. Sodium nitroprusside (SNP) (1 nmol/L to 10  $\mu$ mol/L), an exogenous NO donor, was used to test endothelium-independent relaxation. All the chemicals were from Sigma-Aldrich except thapsigargin which was purchased from Tocris Bioscience.

### Flow-Mediated Dilatation in Pressure Myograph

Segments of mesenteric resistance arteries (second order), dissected free of surrounding adipose tissue, were cannulated

between two glass cannulas with tip diameter  $<100\ \mu\text{m}$  in a chamber filled with 10 mL oxygenated Krebs solution for measuring flow-mediated dilatation (FMD) (28). The cannulated artery was connected to independent Krebs solution with 1% BSA. The intraluminal pressure was monitored by the pressure myograph system (Model 110P; Danish Myo Technology), and vessel diameter were monitored by a light-inverted microscope (Axiovert 40; Carl Zeiss) with video camera and MyoVIEW software (Danish Myo Technology). Under a no-flow condition, the artery segment was subjected to a stepwise increment of 20 mmHg in intraluminal pressure from 20 to 80 mmHg at 5-min intervals at  $37^\circ\text{C}$ . Phe ( $3\ \mu\text{mol/L}$ ) was added to induce vasoconstriction after the vessel's diameter stabilized, and FMD was triggered by a pressure change equal to  $\sim 15\ \text{dynes/cm}^2$  shear stress. Passive dilatation was obtained at the end of the experiment by changing the bathing solution to  $\text{Ca}^{2+}$ -free Krebs solution with 2 mmol/L EGTA. FMD was calculated as the percentage of diameter changes:  $(\text{flow-induced dilatation} - \text{Phe tone})/(\text{passive dilatation} - \text{Phe tone})$ .

### Ex Vivo Culture of Mouse Aortas

Mouse thoracic aortic segments were dissected in sterile PBS and incubated in DMEM (Gibco, Gaithersburg, MD) supplemented with 10% FBS (Gibco) plus 100 IU/mL penicillin and 100  $\mu\text{g/mL}$  streptomycin. Tunicamycin (2  $\mu\text{g/mL}$ ), an ER stress inducer; PBA (10  $\mu\text{mol/L}$ ); TUDCA (20  $\mu\text{mol/L}$ ); adenovirus Ad-CA-PPAR $\delta$  ( $10^6$  plaque-forming units [pfu]/aortic segment); GSK0660 (500 nmol/L); and ROS scavengers, including tempol (100  $\mu\text{mol/L}$ ), tiron (1 mmol/L) plus diethyldithiocarbamate (DETCA) (100  $\mu\text{mol/L}$ ), diphenyleneiodonium (100 nmol/L), and apocynin (100  $\mu\text{mol/L}$ ), were added individually into the culture medium that bathed aortic rings in an incubator at  $37^\circ\text{C}$  for 16 or 24 h. After the incubation period, segments were transferred to fresh Krebs solution for functional studies in a wire myograph and for Western blotting. All the chemicals in this experiment were from Sigma-Aldrich.

### Primary Culture of Mouse Aortic Endothelial Cells

Mice were anesthetized with an intraperitoneal injection of pentobarbital sodium (40 mg/kg). Heparin (100 units/mL in PBS) was infused from the left ventricle into the circulation. Aortas were removed and dissected in sterile PBS. Incubating the aortas with collagenase type I at  $37^\circ\text{C}$  for 8 min detached the endothelial cells, which then were collected by centrifugation, resuspended, and cultured in endothelial cell growth medium supplemented with bovine brain extract (Lonza; Walkersville, MD) until 80–90% confluency. The identity of mouse aortic endothelial cells (MAECs) was verified by a positive staining of endothelial nitric oxide synthase (eNOS) (BD Transduction Laboratories, San Diego, CA) and a negative staining of  $\alpha$ -smooth muscle actin (Abcam, Cambridge, U.K.).

### Western Blot Analysis

Protein samples prepared from mouse aorta homogenates underwent SDS-PAGE and were transferred to an

Immobilon-P polyvinylidene difluoride membrane (Millipore, Bedford, MA). One percent BSA in 0.01% Tween-20 PBS was used to block nonspecific binding sites, and the membranes were probed with primary antibodies against phospho (p)-AMPK $\alpha$  at Thr<sup>172</sup>, AMPK $\alpha$  (Cell Signaling Technology, Danvers, MA), ATF6 (Abcam), p-eIF2 $\alpha$  at Ser<sup>52</sup> (Invitrogen, Carlsbad, CA), eIF2 $\alpha$ , p-JNK at Thr<sup>183</sup>/Tyr<sup>185</sup>, JNK (Cell Signaling), ATF3 (Santa Cruz Biotechnology, Dallas, TX), PPAR $\delta$  (Cayman Chemical, Ann Arbor, MI), p-eNOS at Ser<sup>1177</sup> (Abcam), p-eNOS at Ser<sup>633</sup>, eNOS (BD Transduction Laboratories), caspase-3 (Abcam), and GAPDH (Ambion, Austin, TX) at  $4^\circ\text{C}$  overnight followed by incubation with horseradish peroxidase-conjugated secondary antibodies (DakoCytomation, Carpinteria, CA). The membranes were developed with an enhanced chemiluminescence detection system (ECL reagents; Amersham, Buckinghamshire, U.K.) and exposed on X-ray films.

### Detection of ROS by Dihydroethidium Staining

Aortic segments were fresh-frozen in optimal cutting temperature compound and sectioned (10  $\mu\text{m}$ ) by using a Leica CM 1000 cryostat before incubation in dihydroethidium (DHE) (Ex515/Em585nm, 5  $\mu\text{mol/L}$ ; Invitrogen)-containing normal physiological saline solution at  $37^\circ\text{C}$  for 15 min. The normal physiological saline solution contained (in mmol/L) 140 NaCl, 5 KCl, 1  $\text{CaCl}_2$ , 1  $\text{MgCl}_2$ , 10 glucose, and 5 HEPES (pH 7.4). Fluorescence images were obtained with a confocal system by measuring the fluorescence intensity.

### Measurement of NO Production in MAECs

Intracellular NO level was determined by using an NO-sensitive dye (4-amino-5-methylamino-2',7'-difluorofluorescein diacetate [DAF-DA], Ex495/Em515nm; Molecular Probes) (29). The amount of NO in response to A23187 (1  $\mu\text{mol/L}$ , calcium ionophore; Tocris Bioscience) was evaluated by measuring the fluorescence intensity with a confocal system. Changes in NO production were calculated as  $F1/F0$ , where  $F0$  is the average fluorescence signals before addition of A23187, and  $F1$  is after addition of A23187.

### Statistical Analysis

All results are mean  $\pm$  SEM from the various groups. Cumulative concentration-response curves were analyzed by determining the area under curve. Protein expression was quantified by densitometer (FluorChem; Alpha Innotech, San Leandro, CA) normalized to GAPDH and then compared with control. Data were analyzed using GraphPad Prism software. Comparisons among groups were made using one-way ANOVA followed by Tukey test for multiple comparison. The results were considered statistically significant between groups with  $P < 0.05$ .

## RESULTS

### Exercise Training Improves Vascular Functions of db/db Mice

To examine the vascular benefit of exercise, *db/db* mice and age-matched control mice were subjected to treadmill

running for 4 weeks. Regular running exercise markedly improved EDRs in *db/db* mouse aortas, whereas it had no effect on nondiabetic *db/m*<sup>+</sup> mice (Fig. 1A and B). Endothelium-independent relaxations to SNP were similar among the four groups (Fig. 1C). Moreover, aortas from exercised lean as well as exercised diabetic mice were protected against the effect of LPC (the major component of oxidized LDL cholesterol) (Fig. 1D and E) or thapsigargin (ER stress inducer) (Fig. 1F and G) than the sedentary control mice. We also studied the effect of exercise on small resistance arteries that are more important for vascular homeostasis than for conduit arteries. Exercise enhanced insulin-induced dilatation in main mesenteric arteries from *db/db* mice (Fig. 1H). The impaired FMDs in small resistance arteries from *db/db* mice were improved after exercise (Fig. 1I and J). Exercise slightly reduced the levels of total cholesterol and non-HDL cholesterol in

*db/db* mice (Supplementary Table 1). Body mass, blood glucose, and plasma triglyceride concentration were unchanged.

### Exercise Attenuates ER Stress and Inflammation

To investigate the mechanism of the vascular benefit of exercise, we collected aortas to determine whether NO pathway and ER stress are involved. Exercise restored the reduced phosphorylations of AMPK $\alpha$  at Thr<sup>172</sup> and eNOS at Ser<sup>1177</sup> (indicators of NO bioavailability) in aortas from *db/db* mice (Fig. 2A–C), whereas the total protein levels of AMPK $\alpha$ , eNOS, and p-eNOS Ser<sup>633</sup> were not altered (Supplementary Fig. 1A–C). Plasma nitrite level was elevated after exercise in *db/db* mice (Supplementary Fig. 1D), indicating an enhanced NO bioavailability. The upregulations of ER stress markers, including phosphorylations of eIF2 $\alpha$  at Ser<sup>52</sup> and JNK at Thr<sup>183</sup>/Tyr<sup>185</sup>, ATF3, and cleaved ATF6, were also normalized by exercise (Fig. 2A and D). Exercise also attenuated the downregulation of

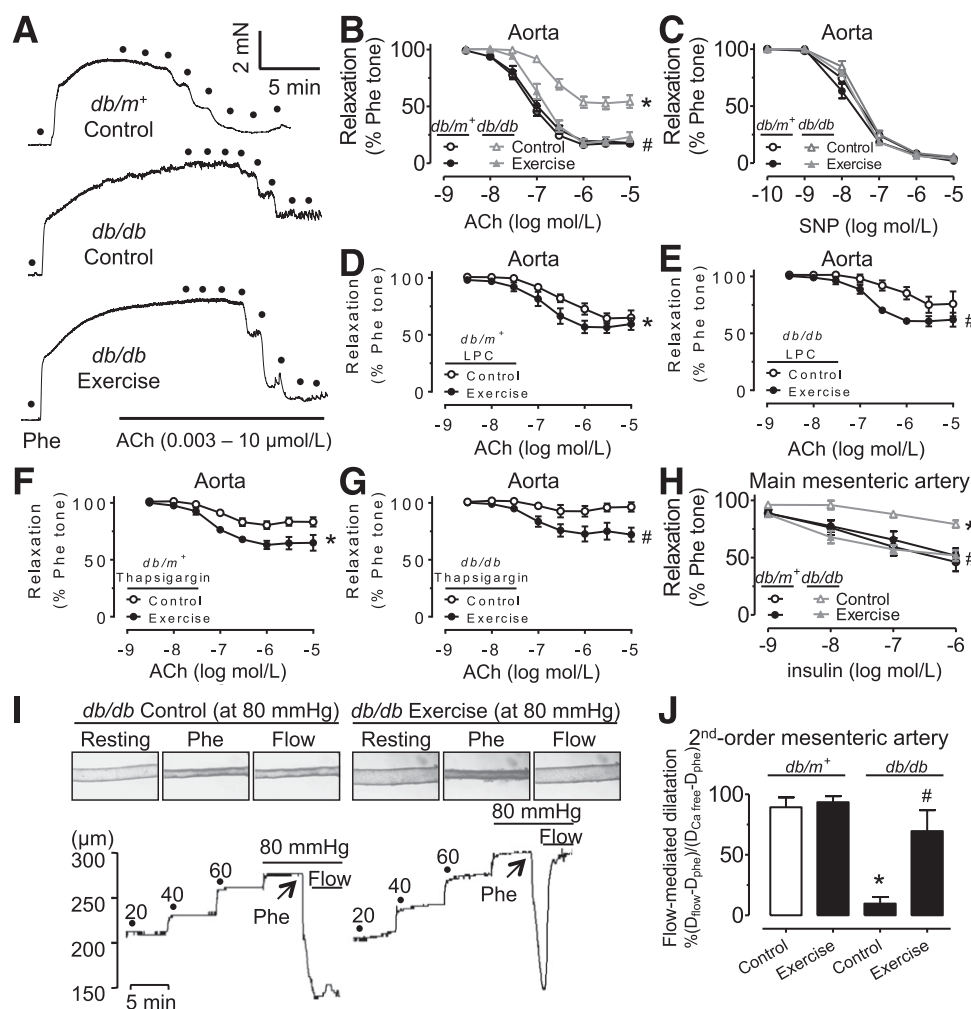

**Figure 1**—Vasoprotective effect of exercise in *db/db* mice. A and B: Effect of treadmill exercise on ACh-induced EDRs in mouse aortas. C: SNP-induced endothelium-independent relaxations in aortas. D–G: Effects of 30-min incubation with 30  $\mu$ mol/L LPC and 0.1  $\mu$ mol/L thapsigargin on relaxations in *db/m*<sup>+</sup> and *db/db* aortas. H: Insulin-induced relaxations in main mesenteric arteries from *db/db* mice. I and J: FMD in second-order mesenteric resistance arteries. Data are mean  $\pm$  SEM from eight mice for each group. \**P* < 0.05 vs. *db/m*<sup>+</sup> control; #*P* < 0.05 vs. *db/db* control. See also Supplementary Fig. 1 and Supplementary Table 1.

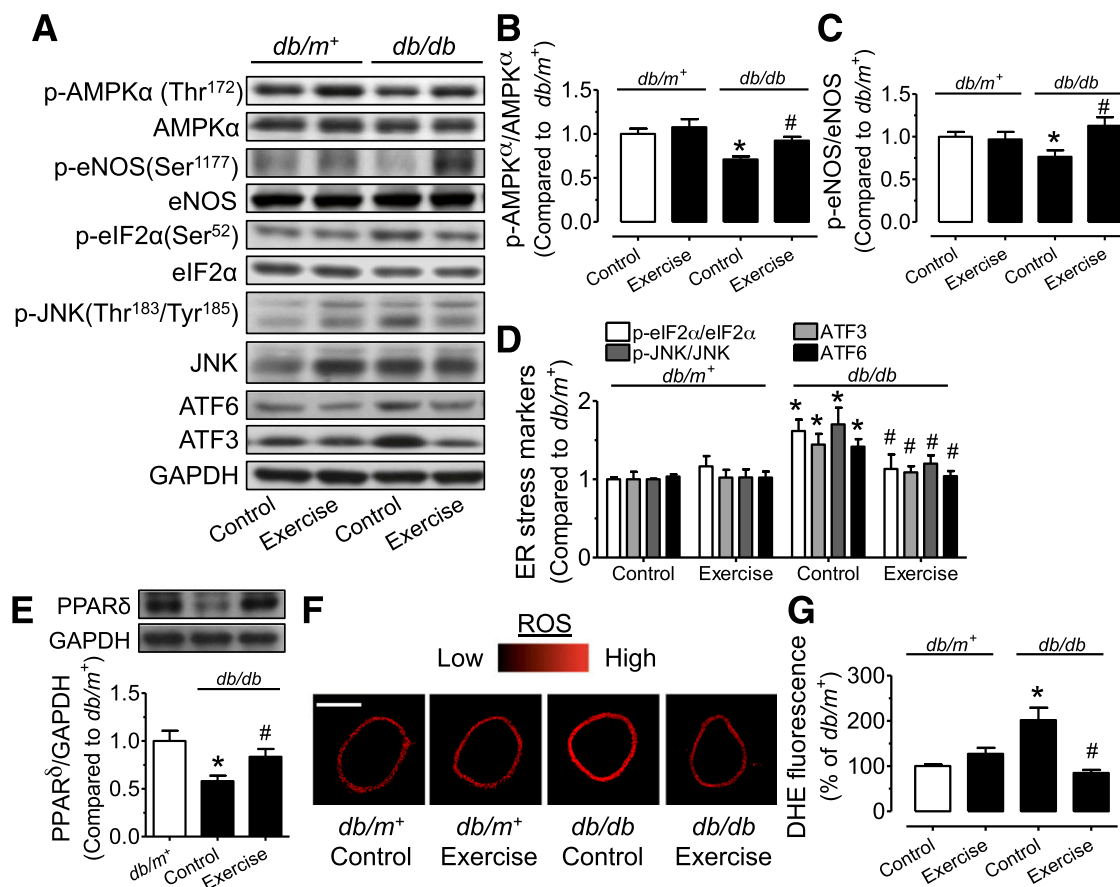

**Figure 2**—Exercise reduces ER stress and oxidative stress. **A–D**: Western blotting showing the phospho- and total AMPK $\alpha$  and eNOS, and the expressions of ER stress markers, including phospho- and total eIF2 $\alpha$  and JNK, ATF3, and cleaved ATF6 in aortas from four groups of mice. **E**: Western blotting of PPAR $\delta$  expression. **F** and **G**: Representative images and summarized graph showing DHE intensity (oxidative stress indicator) in mouse aortas. Scale bar, 0.5 mm. Data are mean  $\pm$  SEM from eight mice for each group. \* $P < 0.05$  vs. *db/m*<sup>+</sup> control; # $P < 0.05$  vs. *db/db* control. See also Supplementary Fig. 1.

PPAR $\delta$  in aorta from *db/db* mice (Fig. 2E). To verify the contribution of PPAR $\delta$  on vascular function, we examined EDRs by using adenovirus Ad-CA-PPAR $\delta$  (30) and PPAR $\delta$  antagonist GSK0660. Ad-CA-PPAR $\delta$  ( $10^6$  pfu/cell, 24 h) increased PPAR $\delta$  protein expression in human umbilical vein endothelial cells (HUVECs) compared with Ad-GFP control (Supplementary Fig. 1E). Overexpressing PPAR $\delta$  by Ad-CA-PPAR $\delta$  ( $10^6$  pfu/aortic segment, 24 h) ameliorated EDRs in aortas from *db/db* mice (Supplementary Fig. 1F). On the other hand, GSK0660 (500 nmol/L, 16 h) blocked the exercise-induced improvement of EDRs in *db/db* mice (Supplementary Fig. 1G). In addition, exercise reduced the elevated oxidative stress in *db/db* mouse aortas (Fig. 2F and G). We also looked at the effect of exercise on vascular inflammation. En face staining of the endothelial surface showed a reduction in vascular cell adhesion molecule 1 (VCAM-1), an inflammatory marker, in *db/db* mice after exercise (Supplementary Fig. 1H and I).

#### Induction of ER Stress Impairs Endothelial Function

Because we found that exercise reduced ER stress and improved NO bioavailability, we next examined whether

the induction of ER stress directly on blood vessels is able to impair vascular function and whether inhibiting ER stress improves it in diabetic mice. We found that tunicamycin (an ER stress inducer, 16 h) impaired EDRs of C57 aortas (Supplementary Fig. 2A), which was reversed by cotreatment with ER stress alleviators PBA and TUDCA (Supplementary Fig. 2B). Induction of ER stress also generated ROS (measured by DHE fluorescence and chemiluminescence) in C57BL/6J mouse aortas, which were inhibited by PBA and TUDCA (Supplementary Fig. 2C and D). Likewise, ROS scavengers, including diphenyleneiodonium (100 nmol/L), apocynin (100  $\mu$ mol/L), tempol (100  $\mu$ mol/L), and tiron (1 mmol/L) plus DETCA (100  $\mu$ mol/L), improved EDRs impaired by tunicamycin (Supplementary Fig. 2E and F). Of note, tiron plus DETCA and tempol did not suppress ER stress markers (Supplementary Fig. 2G and H), suggesting that ROS was induced by ER stress in our experiments. Of note, tunicamycin (2  $\mu$ g/mL, 16 h) did not trigger apoptosis as measured by cleaved caspase-3 in HUVECs (Supplementary Fig. 2I), indicating that tunicamycin did not induce cell death in the endothelium directly. Expressions of multiple genes related to ER stress were altered



in response to tunicamycin (4 h) in HUVECs (Supplementary Fig. 3A). More importantly, we found that PPAR $\delta$  agonist GW1516 (1  $\mu$ mol/L) suppressed the expression of tunicamycin-stimulated genes, including ATF4 (downstream of the PERK/eIF2 $\alpha$  pathway), C/EBP $\beta$  (regulates genes involved in immune and inflammatory responses), and DDIT3 (promotes apoptosis), but did not affect HERPUD1 (related to protein load) or XBP1 (downstream of IRE1 pathway) in HUVECs (Supplementary Fig. 3B–F), which were involved in the ER stress pathways.

### Alleviation of ER Stress Prevents Diabetes-Associated Endothelial Dysfunction

Because we found that ER stress has a direct effect on vascular function ex vivo, we wondered whether administration of an ER stress inhibitor in vivo would improve endothelial function in diabetic mice. Oral gavage of PBA and TUDCA (10 mg/kg/day) for 4 weeks enhanced EDRs in *db/db* mouse aortas (Fig. 3A), with no effect on endothelium-independent relaxations to SNP (Fig. 3B). Insulin-induced dilatations were also augmented in mesenteric arteries of *db/db* mice (Fig. 3C). PBA and TUDCA reduced ER stress markers (p-eIF2 $\alpha$ , ATF3, and ATF6) in *db/db* mouse aortas (Fig. 3D and E). Metabolic parameters, including total cholesterol, triglycerides, and non-HDL cholesterol, were moderately reduced after PBA or TUDCA

treatment, whereas fasting glucose, body mass, and so forth were unaltered (Supplementary Table 2). We also found that mouse aortas exposed to high glucose (30 mmol/L, 48 h) had impaired EDRs that were restored by cotreatment with PBA or TUDCA (Fig. 3F). In addition, both ex vivo high glucose exposure and in vivo (*db/db* mice) treatment-induced ROS production were suppressed by PBA or TUDCA in mouse aortas (Supplementary Fig. 4A and B). Similarly, NO production in response to A23187 (1  $\mu$ mol/L) was blunted in primary MAECs by high glucose (Fig. 3G and H). Treatment of ER stress alleviators (10  $\mu$ mol/L PBA or 20  $\mu$ mol/L TUDCA) restored the decreased NO production. Likewise, tunicamycin attenuated NO production in MAECs, and this effect was inhibited by PBA or TUDCA (Supplementary Fig. 4C and D).

### Exercise Ameliorates Endothelial Function and Oxidative Stress Through PPAR $\delta$ -Dependent Mechanisms

Previous reports suggested that PPAR $\delta$  is the major regulator of metabolic effects of exercise (23,31). However, less is known in the vasculature. We studied whether the vascular effects of exercise are blunted in *Ppard* KO mice. *Ppard* WT and KO mice were fed a high-fat diet for 12 weeks and exercised for 4 weeks. Genotyping verified the identity of *Ppard* WT and KO mice (Supplementary Fig. 5A). DIO *Ppard* WT and KO mice had impaired EDRs

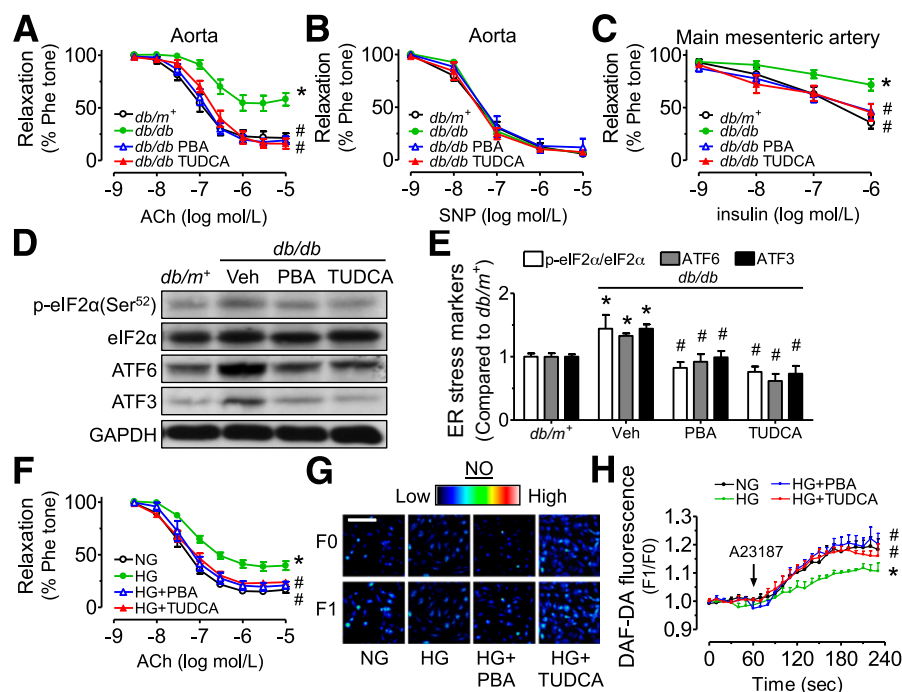

**Figure 3—Alleviation of ER stress protects endothelial function in diabetic mice.** A: Effect of oral administration of PBA or TUDCA (100 mg/kg/day, 4 weeks) on ACh-induced relaxation in *db/db* mouse aortas. B: SNP-induced endothelium-independent relaxations in aortas. C: Insulin-induced relaxations in main mesenteric arteries. D and E: The expressions of ER stress markers eIF2 $\alpha$ , ATF3, and cleaved ATF6 in aortas from *db/db* mice. F: Effect of pretreatments with high glucose (HG) (30 mmol/L, 48 h) and cotreatment with PBA (10  $\mu$ mol/L) or TUDCA (20  $\mu$ mol/L) on ACh-induced relaxations in C57BL/6J mouse aortas. G and H: Representative images and summarized data showing that PBA (10  $\mu$ mol/L) and TUDCA (20  $\mu$ mol/L) rescue NO production (DAF-DA fluorescence) of primary MAECs in response to 1  $\mu$ mol/L A23187 impaired by HG. Scale bar, 0.2 mm. Data are mean  $\pm$  SEM from eight mice for each group (A–E) or from five experiments (F–H). \**P* < 0.05 vs. *db/m*<sup>+</sup> or normal glucose (NG) (5 mmol/L); #*P* < 0.05 vs. *db/db* or HG. See also Supplementary Table 2. Veh, vehicle.

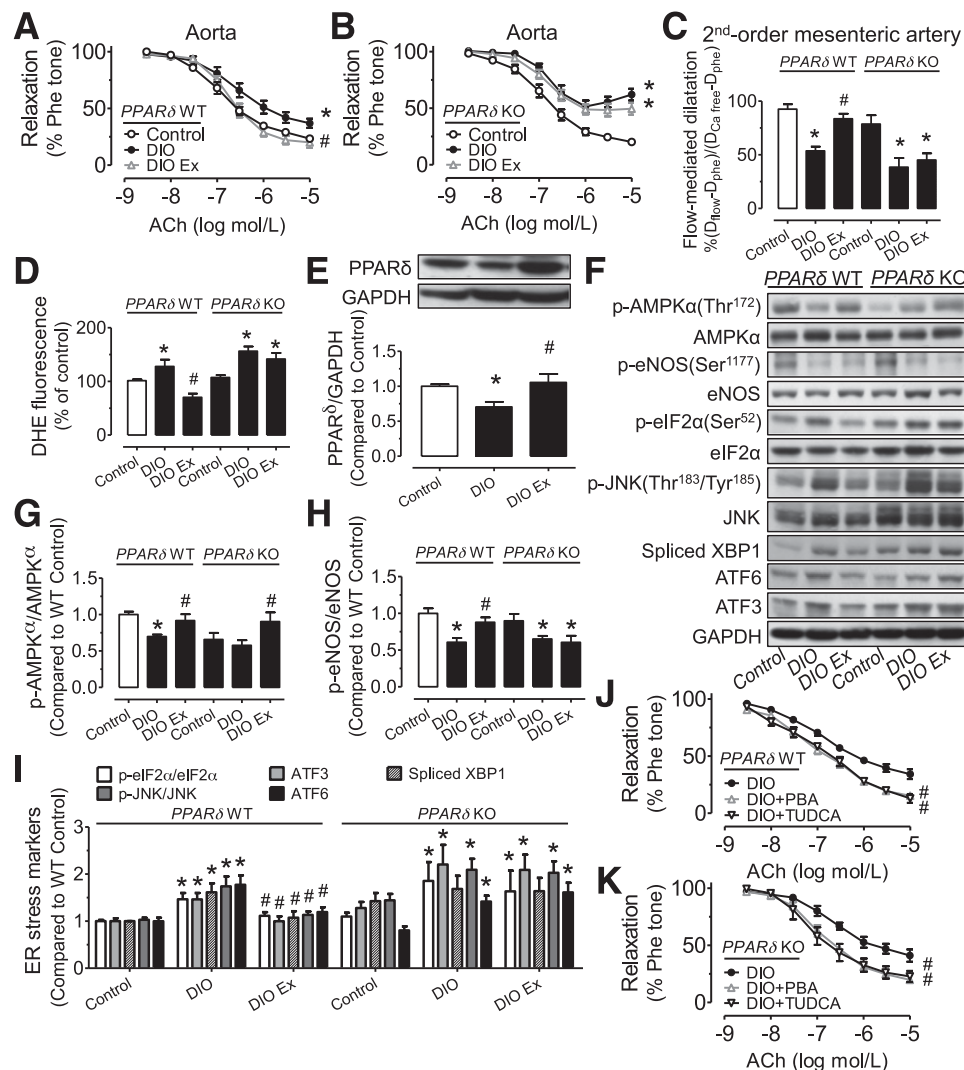

**Figure 4—Role of PPARδ in exercise-induced vascular benefit in DIO mice.** A and B: Effect of exercise for 4 weeks on ACh-induced relaxation of aortas of *Ppard* WT and KO mice. C: Effect of exercise on FMD in second-order mesenteric resistance arteries. D: Effect of exercise on oxidative stress in DIO mouse aortas. E: Western blotting of PPARδ expression in aortas from DIO mice after exercise. F–I: Western blotting of AMPKα, eNOS, eIF2α, spliced XBP1, JNK, ATF3, and cleaved ATF6 in mouse aortas. J and K: Effect of PBA (10 μmol/L) or TUDCA (20 μmol/L) treatment for 16 h on ACh-induced relaxations in DIO *Ppard* WT and KO mouse aortas. Data are mean ± SEM from eight mice for each group. \**P* < 0.05 vs. control; #*P* < 0.05 vs. DIO from each genotype. See also Supplementary Fig. 5 and Supplementary Table 3. Ex, exercise.

in aortas. Exercise training ameliorated endothelial dysfunction in aortas from DIO *Ppard* WT mice (Fig. 4A) but not from *Ppard* KO mice (Fig. 4B). A similar effect was observed for the FMD in mesenteric resistance arteries (Fig. 4C). Compared with DIO *Ppard* WT mice, the impairment of EDR was aggravated at the maximal dose of ACh (10 μmol/L) in DIO *Ppard* KO mice (Supplementary Fig. 5B). One possibility for the occurrence of the small contraction induced in EDR at high doses of ACh in DIO *Ppard* KO mice might be the release of endothelium-derived contracting factors under diabetic conditions (32), which remains unclear and needs future work to address this in greater detail. Exercise also reduced ROS in DIO *Ppard* WT mice but not in *Ppard* KO mice (Fig. 4D). Although the total cholesterol, triglycerides, and non-HDL cholesterol were lower in *Ppard* KO than in *Ppard* WT

mice, no difference was found between the sedentary and exercise groups in the same genotype (Supplementary Table 3). Regular exercise for 4 weeks moderately reduced blood glucose but had no effect on either body mass or plasma lipids.

### Exercise Suppresses ER Stress Through PPARδ

We wondered whether the inhibition on ER stress is also PPARδ dependent. The reduced PPARδ expression in aortas from DIO *Ppard* WT mice was enhanced with exercise (Fig. 4E). Exercise activated AMPK in aortas from both DIO *Ppard* WT and *Ppard* KO mice. Reduced p-eNOS and upregulations of p-eIF2α, p-JNK, spliced XBP1, ATF3, and cleaved ATF6 were all normalized in *Ppard* WT after exercise but not in *Ppard* KO mice (Fig. 4F–I). However, the anti-inflammatory effect of exercise was independent of

PPAR $\delta$  because reduction of VCAM-1 level was observed in both DIO *Ppard* WT and *Ppard* KO mice (Supplementary Fig. 5C). Unlike exercise, PBA (10  $\mu$ mol/L) or TUDCA (20  $\mu$ mol/L) treatment for 16 h restored EDRs in aortas from both DIO *Ppard* WT and *Ppard* KO mice (Fig. 4J and K). Endothelium-independent relaxations to SNP were similar (Supplementary Fig. 5D and E). More representative blots for ER stress markers in individual animals are shown in Supplementary Figs. 6 and 7.

## DISCUSSION

The current study used multiple approaches aided by the use of type 2 *db/db* mice and *Ppard* KO mice to elucidate whether PPAR $\delta$  plays an essential role in exercise-induced suppression of ER stress and protection of vasodilatation. Exercise ameliorates impaired EDRs in conduit aortas and mesenteric resistance arteries in both diabetic and obese mice accompanied by increases of vascular AMPK and eNOS activities and inhibition of ER stress, vascular inflammation, and oxidative stress. Exercise in *Ppard* KO and WT mice shows that PPAR $\delta$  is a significant contributor to the beneficial effects of exercise on vascular function in obese mice by attenuating ER stress and oxidative stress. Collectively, the data suggest that PPAR $\delta$  acts as the major regulator in response to exercise to restore vascular homeostasis in diabetes and obesity.

Earlier work by others showed that exercise helps to prevent CVD in patients with diabetes and diabetic animals (2,3) through increasing NO bioavailability (14) and limiting oxidative stress (15,16). A later study discovered AMPK activation by exercise as a result of an increase in the cellular AMP/ATP ratio (33). Phosphorylation/activation of eNOS is known to be triggered by AMPK (34). AMPK also mitigates ROS production associated with diabetes (35,36). A genetic study in humans demonstrated that exercise induces epigenetic modifications, particularly DNA methylation changes of PRKAB1 (the gene encoding the AMPK subunit), indicating that exercise modulates AMPK in humans (37). We also show that 4-week exercise in diabetic mice enhances EDRs without changing endothelium-independent relaxation of vascular smooth muscle in both conduit and resistance arteries, and this improvement was accompanied by increased AMPK and eNOS activities and decreased ROS production in the vasculature. Chronic low-grade inflammation actively participates in the development of vascular dysfunction associated with diabetes and obesity. Atherosclerotic lesions are preferentially developed at arterial branches and curvatures where disturbed and reciprocating flow is commonly present (38,39). Disturbed flow induces expressions of proatherogenic genes in endothelial cells, mainly chemokines and adhesion molecules such as VCAM-1, intracellular adhesion molecule 1, and MCP-1 (40). Such changes are accompanied by downregulation of antioxidative enzymes and reduced production and function of vasodilators (NO and prostacyclin) (41). On the contrary, laminar flow produces an opposing effect by upregulation of antiatherogenic genes, which are beneficial

for endothelial cells (42). Of note, exercise enhances laminar flow (17). Consistent with this, we show that VCAM-1 upregulation in the thoracic aortas of diabetic mice is ameliorated by exercise. However, whether PPAR $\delta$  is involved in the mechanism underlying the anti-inflammatory effect of exercise in the vasculature needs further exploration.

We also looked at whether a common initiator induces vascular dysfunction by modulating NO and ROS in the vasculature and whether it is a target of physical exercise. Growing evidence suggests that ER stress is a central feature of insulin resistance in diabetes and obesity (10). Therefore, we examined all three branches of ER stress: eIF2 $\alpha$  and ATF3 downstream of the PERK pathway, XBP1 and JNK activated by autophosphorylated IRE1, and cleaved active ATF6. Exercise is effective at suppressing all three pathways of ER stress in diabetic mice. We then show that ER stress induction directly impairs endothelial function accompanied by elevated ROS generation and reduced NO production in aortas and endothelial cells. More importantly, alleviation of ER stress in vivo and ex vivo inhibited the vascular oxidative stress and rescued endothelial function in diabetic mice. These data indicate the causative role of ER stress in vascular dysfunction of diabetic mice. Of note, ROS scavengers did not suppress ER stress markers, so ER stress in the diabetic mouse vasculature is upstream of ROS generation. The data show no obvious changes of glucose metabolism with chronic oral treatment of PBA or TUDCA, which are contradictory with a previous study that showed that PBA and TUDCA improves glucose metabolism in *ob/ob* mice (43). This may be explained by the difference in treatment duration, dosage (10 times less in the current study), and animal models used. However, PBA and TUDCA lower the plasma level of triglycerides, and both effects might partially contribute to the vasoprotective effect of ER stress inhibition. Nevertheless, the direct effect of PBA and TUDCA on isolated aortas where ambient insulin and lipid levels are constant suggests that the contribution of lipid modulation should be minimal. Exercise protects endothelial function by counteracting the heightened ER stress and oxidative stress in diabetic mice or in the presence of thapsigargin or LPC.

AMPK is a physiological suppressor of ER stress (13,44) and incorporates PPAR $\delta$  to regulate gene transcription in response to exercise (23). PPAR $\delta$  activation by GW1516 increases insulin sensitivity (45) and protects endothelial function in diabetes (46). Our previous study also supported that PPAR $\delta$  mediates the effect of metformin (AMPK activator) to attenuate ER stress and subsequently endothelial dysfunction in aortas from obese mice (24). Indeed, we found that PPAR $\delta$  was upregulated in exercised diabetic mice and that PPAR $\delta$  overexpression was able to rescue ER stress-induced endothelial dysfunction. More importantly, PPAR $\delta$  antagonist and PPAR $\delta$  deletion abolished the effect of exercise on relaxation, ER stress, ROS, and NO bioavailability without affecting AMPK activation in arteries. This provides solid evidence



that supports PPAR $\delta$  as indispensable in the cellular responses to exercise for inhibition of ER stress and oxidative stress, thus favoring NO production in endothelial cells. PPAR $\delta$  agonist directly affected the suppression of the transcription of ATF4, C/EBP $\beta$ , and DDIT3 but had no impact on HERPUD1 or XBP1. We cannot rule out the possibility that PPAR $\delta$  may have an effect on genes related to ER stress after interacting with other activated proteins, although it does not work alone. A previous report suggested that AMPK $\alpha$  and PGC1 $\alpha$  cooperatively interact with PPAR $\delta$  to further induce transcriptional activity (23). ER stress alleviators restored relaxation in obese *Ppard*-deficient mice, which supports that ER stress alleviation is downstream of PPAR $\delta$  activation, contributing to the vascular benefit of exercise. Excessive nutrients, such as glucose and lipids, in diabetes are common risk factors that cause vascular complications (47). Exercise reduces blood glucose and plasma cholesterol levels. Furthermore, exercise increased brown fat mass in both DIO *Ppard* WT and KO mice in the current study (data not shown), whereas browning of adipose tissue is accompanied by an increase in energy expenditure (48). The protective effect of exercise against endothelial dysfunction might be partially due to its favorable modulation of glucose and lipid metabolism. Both animal and clinical studies have reported that PPARs benefit vascular function and that PPARs can become potential useful targets for pharmaceutical intervention in the protection against vascular complications in diabetes (49–51). Given the publicized adverse effect of the PPAR $\gamma$  agonist rosiglitazone on cardiovascular outcomes in patients with diabetes (52,53) and the obligatory role of PPAR $\delta$  on the vascular benefits of exercise, PPAR $\delta$  could be a hopeful alternative target for the treatment of cardiovascular events in diabetes.

In conclusion, the current study provides new insights into the benefits of physical exercise on vascular health by reducing ER stress and oxidative stress and enhancing eNOS activity and NO production. This study also identifies PPAR $\delta$  as a critical mediator for the vascular benefits of exercise to restore endothelial function in obesity and diabetes. Clinical studies have shown different outcomes of exercise and diabetic drug intervention in patients with type 2 diabetes probably due to variances of study duration, the intensification of medication overtime, and so forth (5,54). The current novel findings should help to arouse public awareness about the importance of physical activity to prevent or delay the onset of diabetes and obesity-related vasculopathy. The AMPK/PPAR $\delta$  signaling cascade is a potentially effective target in response to orally active antidiabetic drugs in the treatment of vascular and metabolic diseases.

**Acknowledgments.** The authors thank Hongsong Zhang and Dan Qu from the Huang laboratory, School of Biomedical Sciences, CUHK, for helpful discussion and excellent technical assistance.

**Funding.** This study was supported by Hong Kong Research Grant Council grants CUHK2/CRF/12G (to Y.H.), CUHK464712 and CUHK465611 (to Y.H.), and

T12-402/13-N (to R.C.W.M.); CUHK Direct Grant 2015.2.046 (to X.Y.T.), CUHK Vice-Chancellor's Discretionary Fund and CUHK Lui Che Woo Foundation (to Y.H.); National Basic Research Program of China 973 grant 2012CB517805 (to Y.H.); and National Nature Science Foundation of China grant 91339117 (to Y.H.).

**Duality of Interest.** No potential conflicts of interest relevant to this article were reported.

**Author Contributions.** W.S.C. and X.Y.T. contributed to the experiments, data analysis, and writing of the manuscript. W.T.W. contributed to the study design, data analysis, and writing of the manuscript. L.Z., J.X., L.W., and C.W.L. contributed to the experiments. Z.Y.C., R.C.W.M., A.X., and N.W. contributed crucial reagents and to the discussion and review of the manuscript. Y.H. supplied material and contributed to the study design, data analysis, and writing of the manuscript. X.Y.T. and Y.H. are the guarantors of this work and, as such, had full access to all the data in the study and take responsibility for the integrity of the data and the accuracy of the data analysis.

## References

1. Finucane MM, Stevens GA, Cowan MJ, et al.; Global Burden of Metabolic Risk Factors of Chronic Diseases Collaborating Group (Body Mass Index). National, regional, and global trends in body-mass index since 1980: systematic analysis of health examination surveys and epidemiological studies with 960 country-years and 9.1 million participants. *Lancet* 2011;377:557–567
2. Thompson PD, Buchner D, Pina IL, et al.; American Heart Association Council on Clinical Cardiology Subcommittee on Exercise, Rehabilitation, and Prevention; American Heart Association Council on Nutrition, Physical Activity, and Metabolism Subcommittee on Physical Activity. Exercise and physical activity in the prevention and treatment of atherosclerotic cardiovascular disease: a statement from the Council on Clinical Cardiology (Subcommittee on Exercise, Rehabilitation, and Prevention) and the Council on Nutrition, Physical Activity, and Metabolism (Subcommittee on Physical Activity). *Circulation* 2003;107:3109–3116
3. Colberg SR, Sigal RJ, Fernhall B, et al.; American College of Sports Medicine; American Diabetes Association. Exercise and type 2 diabetes: the American College of Sports Medicine and the American Diabetes Association: joint position statement executive summary. *Diabetes Care* 2010;33:2692–2696
4. Naci H, Ioannidis JPA. Comparative effectiveness of exercise and drug interventions on mortality outcomes: metaepidemiological study. *BMJ* 2013;347:f5577
5. Knowler WC, Barrett-Connor E, Fowler SE, et al.; Diabetes Prevention Program Research Group. Reduction in the incidence of type 2 diabetes with lifestyle intervention or metformin. *N Engl J Med* 2002;346:393–403
6. Hotamisligil GS. Endoplasmic reticulum stress and the inflammatory basis of metabolic disease. *Cell* 2010;140:900–917
7. Gething MJ, Sambrook J. Protein folding in the cell. *Nature* 1992;355:33–45
8. Zhang K, Kaufman RJ. From endoplasmic-reticulum stress to the inflammatory response. *Nature* 2008;454:455–462
9. Civelek M, Manduchi E, Riley RJ, Stoeckert CJ Jr, Davies PF. Chronic endoplasmic reticulum stress activates unfolded protein response in arterial endothelium in regions of susceptibility to atherosclerosis. *Circ Res* 2009;105:453–461
10. Ozcan U, Cao Q, Yilmaz E, et al. Endoplasmic reticulum stress links obesity, insulin action, and type 2 diabetes. *Science* 2004;306:457–461
11. Younce CW, Wang K, Kolattukudy PE. Hyperglycaemia-induced cardiomyocyte death is mediated via MCP-1 production and induction of a novel zinc-finger protein MCPIP. *Cardiovasc Res* 2010;87:665–674
12. Borradaile NM, Han X, Harp JD, Gale SE, Ory DS, Schaffer JE. Disruption of endoplasmic reticulum structure and integrity in lipotoxic cell death. *J Lipid Res* 2006;47:2726–2737
13. Dong Y, Zhang M, Wang S, et al. Activation of AMP-activated protein kinase inhibits oxidized LDL-triggered endoplasmic reticulum stress in vivo. *Diabetes* 2010;59:1386–1396
14. Napoli C, Williams-Ignarro S, De Nigris F, et al. Long-term combined beneficial effects of physical training and metabolic treatment on atherosclerosis in hypercholesterolemic mice. *Proc Natl Acad Sci U S A* 2004;101:8797–8802

15. Ding H, Jiang N, Liu H, et al. Response of mitochondrial fusion and fission protein gene expression to exercise in rat skeletal muscle. *Biochim Biophys Acta* 2010;1800:250–256
16. Asghar M, George L, Lokhandwala MF. Exercise decreases oxidative stress and inflammation and restores renal dopamine D1 receptor function in old rats. *Am J Physiol Renal Physiol* 2007;293:F914–F919
17. Cheng C, van Haperen R, de Waard M, et al. Shear stress affects the intracellular distribution of eNOS: direct demonstration by a novel in vivo technique. *Blood* 2005;106:3691–3698
18. Bassel-Duby R, Olson EN. Signaling pathways in skeletal muscle remodeling. *Annu Rev Biochem* 2006;75:19–37
19. Akimoto T, Pohnert SC, Li P, et al. Exercise stimulates Pgc-1 $\alpha$  transcription in skeletal muscle through activation of the p38 MAPK pathway. *J Biol Chem* 2005;280:19587–19593
20. Srivastava RAK, Pinkosky SL, Filippov S, Hanselman JC, Cramer CT, Newton RS. AMP-activated protein kinase: an emerging drug target to regulate imbalances in lipid and carbohydrate metabolism to treat cardio-metabolic diseases. *J Lipid Res* 2012;53:2490–2514
21. Chen ZP, Mitchellhill KI, Michell BJ, et al. AMP-activated protein kinase phosphorylation of endothelial NO synthase. *FEBS Lett* 1999;443:285–289
22. Rasmussen BB, Holmback UC, Volpi E, Morio-Liondore B, Paddon-Jones D, Wolfe RR. Malonyl coenzyme A and the regulation of functional carnitine palmitoyltransferase-1 activity and fat oxidation in human skeletal muscle. *J Clin Invest* 2002;110:1687–1693
23. Narkar VA, Downes M, Yu RT, et al. AMPK and PPAR $\delta$  agonists are exercise mimetics. *Cell* 2008;134:405–415
24. Cheang WS, Tian XY, Wong WT, et al. Metformin protects endothelial function in diet-induced obese mice by inhibition of endoplasmic reticulum stress through 5' adenosine monophosphate-activated protein kinase-peroxisome proliferator-activated receptor  $\delta$  pathway. *Arterioscler Thromb Vasc Biol* 2014;34:830–836
25. Peters JM, Lee SS, Li W, et al. Growth, adipose, brain, and skin alterations resulting from targeted disruption of the mouse peroxisome proliferator-activated receptor beta( $\delta$ ). *Mol Cell Biol* 2000;20:5119–5128
26. Verma-Ahuja S, Husain K, Verhulst S, Espinosa JA, Somani SM. Delayed effects of pyridostigmine and exercise training on acetylcholinesterase and muscle tension in mouse lower extremity. *Arch Toxicol* 2000;74:539–546
27. Wong WT, Tian XY, Chen Y, et al. Bone morphogenic protein-4 impairs endothelial function through oxidative stress-dependent cyclooxygenase-2 up-regulation: implications on hypertension. *Circ Res* 2010;107:984–991
28. Chan YC, Leung FP, Wong WT, et al. Therapeutically relevant concentrations of raloxifene dilate pressurized rat resistance arteries via calcium-dependent endothelial nitric oxide synthase activation. *Arterioscler Thromb Vasc Biol* 2010;30:992–999
29. Liu L, Liu J, Wong WT, et al. Dipeptidyl peptidase 4 inhibitor sitagliptin protects endothelial function in hypertension through a glucagon-like peptide 1-dependent mechanism. *Hypertension* 2012;60:833–841
30. Wang N, Verna L, Chen NG, et al. Constitutive activation of peroxisome proliferator-activated receptor-gamma suppresses pro-inflammatory adhesion molecules in human vascular endothelial cells. *J Biol Chem* 2002;277:34176–34181
31. Wang YX, Zhang CL, Yu RT, et al. Regulation of muscle fiber type and running endurance by PPAR  $\delta$ . *PLoS Biol* 2004;2:1532–1539
32. Zhang Y, Liu J, Luo JY, et al. Upregulation of angiotensin (1-7)-mediated signaling preserves endothelial function through reducing oxidative stress in diabetes. *Antioxid Redox Signal* 2015;23:880–892
33. Hardie DG. AMP-activated/SNF1 protein kinases: conserved guardians of cellular energy. *Nat Rev Mol Cell Biol* 2007;8:774–785
34. Chen ZP, McConnell GK, Michell BJ, Snow RJ, Canny BJ, Kemp BE. AMPK signalling in contracting human skeletal muscle: acetyl-CoA carboxylase and NO synthase phosphorylation. *Am J Physiol Endocrinol Metab* 2000;279:E1202–E1206
35. Ouslimani N, Peynet J, Bonnefont-Rousselot D, Thérond P, Legrand A, Beaudoux JL. Metformin decreases intracellular production of reactive oxygen species in aortic endothelial cells. *Metabolism* 2005;54:829–834
36. Mahrour M, Ouslimani N, Peynet J, et al. Metformin reduces angiotensin-mediated intracellular production of reactive oxygen species in endothelial cells through the inhibition of protein kinase C. *Biochem Pharmacol* 2006;72:176–183
37. Nitert MD, Dayeh T, Volkov P, et al. Impact of an exercise intervention on DNA methylation in skeletal muscle from first-degree relatives of patients with type 2 diabetes. *Diabetes* 2012;61:3322–3332
38. Libby P, Theroux P. Pathophysiology of coronary artery disease. *Circulation* 2005;111:3481–3488
39. Asakura T, Karino T. Flow patterns and spatial distribution of atherosclerotic lesions in human coronary arteries. *Circ Res* 1990;66:1045–1066
40. Chiu JJ, Chien S. Effects of disturbed flow on vascular endothelium: pathophysiological basis and clinical perspectives. *Physiol Rev* 2011;91:327–387
41. Shyy YJ, Hsieh HJ, Usami S, Chien S. Fluid shear stress induces a biphasic response of human monocyte chemotactic protein 1 gene expression in vascular endothelium. *Proc Natl Acad Sci U S A* 1994;91:4678–4682
42. Berk BC. Atheroprotective signaling mechanisms activated by steady laminar flow in endothelial cells. *Circulation* 2008;117:1082–1089
43. Ozcan U, Yilmaz E, Ozcan L, et al. Chemical chaperones reduce ER stress and restore glucose homeostasis in a mouse model of type 2 diabetes. *Science* 2006;313:1137–1140
44. Davis BJ, Xie Z, Viollet B, Zou MH. Activation of the AMP-activated kinase by antidiabetic drug metformin stimulates nitric oxide synthesis in vivo by promoting the association of heat shock protein 90 and endothelial nitric oxide synthase. *Diabetes* 2006;55:496–505
45. Lee CH, Olson P, Heverner A, et al. PPAR $\delta$  regulates glucose metabolism and insulin sensitivity. *Proc Natl Acad Sci U S A* 2006;103:3444–3449
46. Tian XY, Wong WT, Wang N, et al. PPAR $\delta$  activation protects endothelial function in diabetic mice. *Diabetes* 2012;61:3285–3293
47. Sena CM, Pereira AM, Seica R. Endothelial dysfunction - a major mediator of diabetic vascular disease. *Biochim Biophys Acta* 2013;1832:2216–2231
48. Castillo-Quan JL. From white to brown fat through the PGC-1 $\alpha$ -dependent myokine irisin: implications for diabetes and obesity. *Dis Model Mech* 2012;5:293–295
49. Campia U, Matuskey LA, Panza JA. Peroxisome proliferator-activated receptor-gamma activation with pioglitazone improves endothelium-dependent dilation in nondiabetic patients with major cardiovascular risk factors. *Circulation* 2006;113:867–875
50. McMahon GT, Plutzky J, Daher E, Bhattacharyya T, Grunberger G, DiCarli MF. Effect of a peroxisome proliferator-activated receptor-gamma agonist on myocardial blood flow in type 2 diabetes. *Diabetes Care* 2005;28:1145–1150
51. Werner C, Kamani CH, Gensch C, Böhm M, Laufs U. The peroxisome proliferator-activated receptor-gamma agonist pioglitazone increases number and function of endothelial progenitor cells in patients with coronary artery disease and normal glucose tolerance. *Diabetes* 2007;56:2609–2615
52. Nissen SE, Wolski K. Effect of rosiglitazone on the risk of myocardial infarction and death from cardiovascular causes. *N Engl J Med* 2007;356:2457–2471
53. Home PD, Pocock SJ, Beck-Nielsen H, et al.; RECORD Study Group. Rosiglitazone evaluated for cardiovascular outcomes—an interim analysis. *N Engl J Med* 2007;357:28–38
54. Wing RR, Bolin P, Brancati FL, et al.; Look AHEAD Research Group. Cardiovascular effects of intensive lifestyle intervention in type 2 diabetes. *N Engl J Med* 2013;369:145–154
